# Supplementary material for: Aspirin Improves Nonalcoholic Fatty Liver Disease and Atherosclerosis through Regulation of the PPARδ‐AMPK‐PGC‐1α Pathway in Dyslipidemic Conditions
Source: Hindawi journal article supplement (doi:10.1155/2020/7806860), 2020-01-01
Supplement: f1 [file 7806860.f1.pdf]

## Supplementary figure legends

### **Supplementary Figure. 1 The mean amount of diet intake (A) per rabbit per week and the mean body weight (B) per rabbit per week.**

The diet intake amount and body weight decreased by cholesterol diet were ameliorated via the treatment of aspirin.

### **Supplementary Figure. 2 Western blot analysis (A) and ELISA (B) of TFAM in HepG2 cells that were treated with high concentrations of palmitate and cholesterol, aspirin, and GSK0660.**

In Western blotting and ELISA results, the decreased TFAM protein levels in CP group compared to control were increased in CPA group, however, the effect of aspirin was reversed by PPAR $\delta$  antagonist, GSK0660. Values were statistically analyzed by unpaired t-test and one way ANOVA. An upper line on the three bars means one way ANOVA analysis. All experiments were over repeated three and over times. Meaning of indications: Ctrl is an untreated control group, CP is a cholesterol and palmitate treated group, CPA is a cholesterol, palmitate, and aspirin treated group, and CPAG is a cholesterol, palmitate, aspirin, and GSK0660 treated group. \*  $p < 0.05$ , \*\*  $p < 0.01$ , \*\*\*  $p < 0.001$ .

Supplementary figure. 1

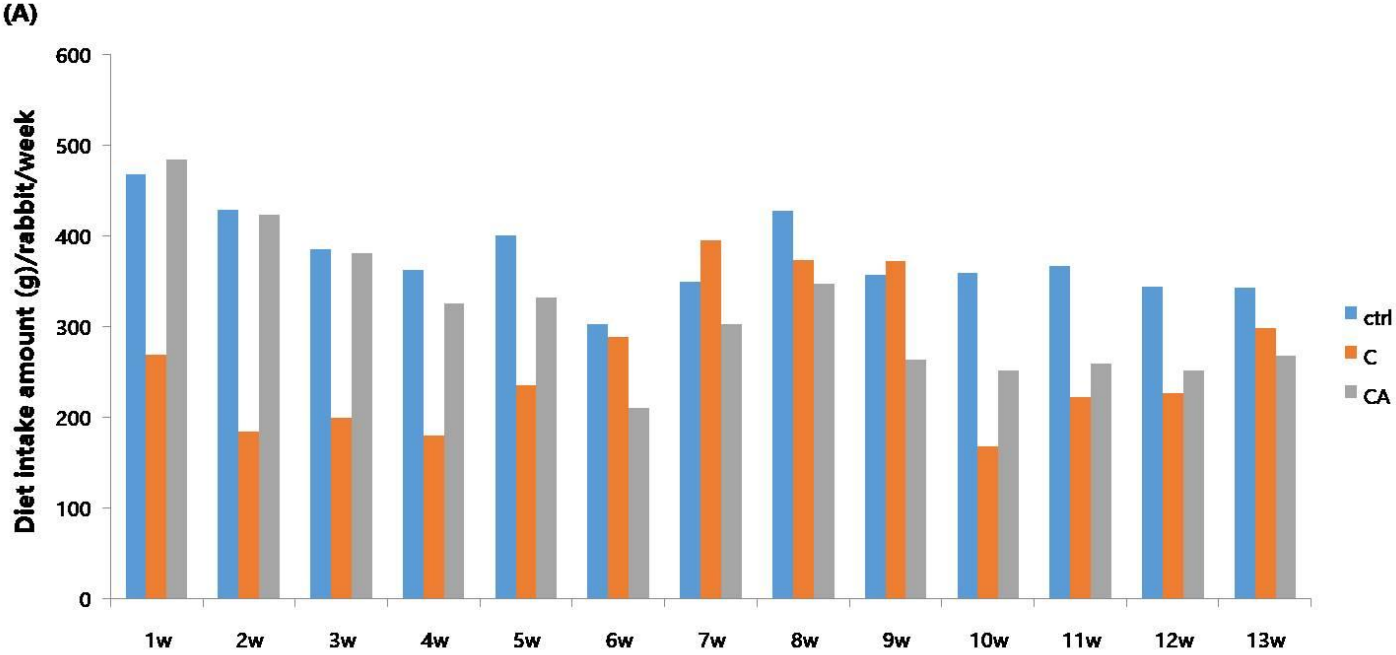

(B)

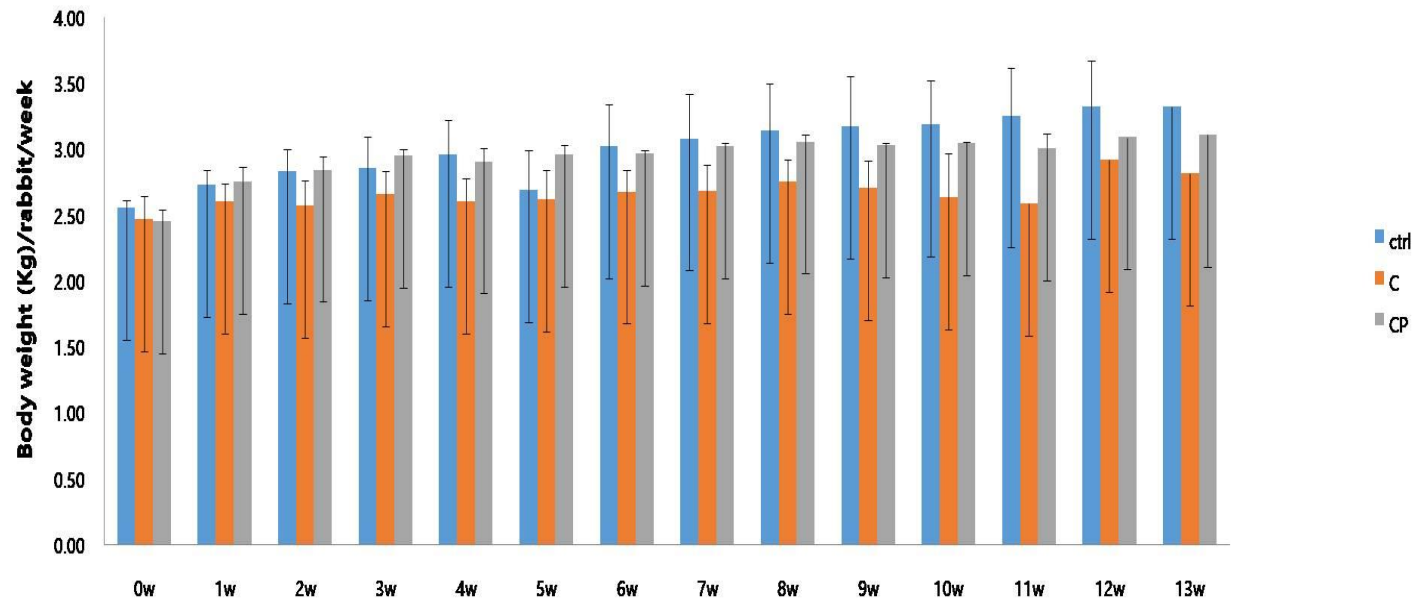

Supplementary figure. 2

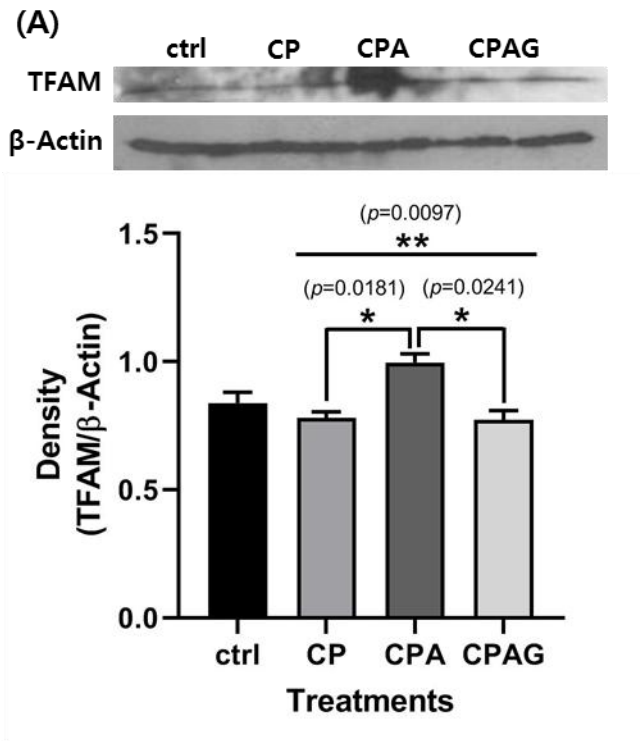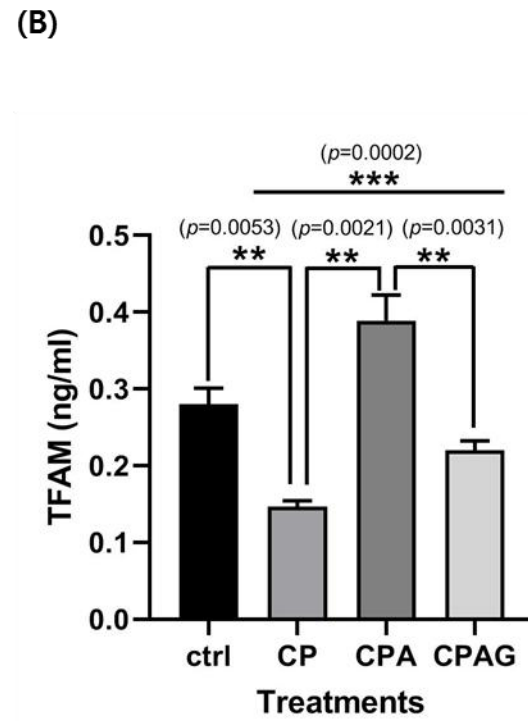

**Supplementary Table. The correlation analysis among macrophage antigen, AT1R, and Oil Red O staining in liver and aorta from rabbits**

|                   |                                 |                         | Correlations                       |                |               |                                    |                   |               |
|-------------------|---------------------------------|-------------------------|------------------------------------|----------------|---------------|------------------------------------|-------------------|---------------|
|                   |                                 |                         | liver<br>macrophage<br>antigen IHC | liver AT1R IHC | liver OIL R O | aorta<br>macrophage<br>antigen IHC | aorta AT1R<br>IHC | aorta OIL R O |
| Spearman's<br>rho | liver macrophage<br>antigen IHC | Correlation Coefficient | 1.000                              | .525*          | .441          | .313                               | .450*             | .340          |
|                   |                                 | Sig. (2-tailed)         | .                                  | .018           | .052          | .179                               | .047              | .143          |
|                   |                                 | N                       | 20                                 | 20             | 20            | 20                                 | 20                | 20            |
|                   | liver AT1R IHC                  | Correlation Coefficient | .525*                              | 1.000          | .693**        | .756**                             | .809**            | .600**        |
|                   |                                 | Sig. (2-tailed)         | .018                               | .              | .001          | .000                               | .000              | .005          |
|                   |                                 | N                       | 20                                 | 20             | 20            | 20                                 | 20                | 20            |
|                   | liver OIL R O                   | Correlation Coefficient | .441                               | .693**         | 1.000         | .832**                             | .750**            | .797**        |
|                   |                                 | Sig. (2-tailed)         | .052                               | .001           | .             | .000                               | .000              | .000          |
|                   |                                 | N                       | 20                                 | 20             | 20            | 20                                 | 20                | 20            |
|                   | aorta macrophage<br>antigen IHC | Correlation Coefficient | .313                               | .756**         | .832**        | 1.000                              | .792**            | .866**        |
|                   |                                 | Sig. (2-tailed)         | .179                               | .000           | .000          | .                                  | .000              | .000          |
|                   |                                 | N                       | 20                                 | 20             | 20            | 20                                 | 20                | 20            |
| aorta AT1R IHC    | Correlation Coefficient         | .450*                   | .809**                             | .750**         | .792**        | 1.000                              | .713**            |               |
|                   | Sig. (2-tailed)                 | .047                    | .000                               | .000           | .000          | .                                  | .000              |               |
|                   | N                               | 20                      | 20                                 | 20             | 20            | 20                                 | 20                |               |
| aorta OIL R O     | Correlation Coefficient         | .340                    | .600**                             | .797**         | .866**        | .713**                             | 1.000             |               |
|                   | Sig. (2-tailed)                 | .143                    | .005                               | .000           | .000          | .000                               | .                 |               |
|                   | N                               | 20                      | 20                                 | 20             | 20            | 20                                 | 20                |               |

\*. Correlation is significant at the 0.05 level (2-tailed).

\*\* . Correlation is significant at the 0.01 level (2-tailed).
